# Supplementary material for: COVID treatment and in-hospital length of stay inequalities between race in the US over time
Source: bioRxiv or medRxiv preprint supplement (doi:10.1101/2022.09.30.22280586), 2022-10-01
Supplement: Supplementary file [file media-1.pdf]

## Supplementary Material for: COVID treatment and in-hospital length of stay inequalities between race in the US over time

Benjamin M. Althouse, PhD, ScM<sup>1,2,3</sup>, Charlotte Baker, DrPH, MPH, CPH<sup>1</sup>, Peter D Smits, PhD<sup>1</sup>, Samuel Gratzl, PhD<sup>1</sup>, Ryan H Lee, MD<sup>1</sup>, Brianna M Goodwin Cartwright, MS<sup>1</sup>, Michael Simonov, MD<sup>1,4</sup>, Michael D Wang, MD<sup>1</sup>, Nicholas L Stucky, MD, PhD<sup>1\*</sup>

(1) Truveta, Inc, Bellevue, WA; (2) University of Washington, Seattle, Washington; (3) New Mexico State University, Las Cruces, New Mexico; (4) Yale School of Medicine, New Haven, CT

\* Corresponding author email: nicholass@truveta.com

### Data element definitions

Below are the codes used for defining the COVID outcome as well as for the comorbidities.

#### Remdesivir treatment:

RxNorm: 2367757, 2367758, 2284718, 2284957, 2284958, 2284959, 2284960, 2395503, 2395499, 2395500, 2395502, 2395504

#### COVID Outcome

##### COVID:

ICD-10: B97.29, U07.1, Z86.16;

SNOMED CT: 840539006, 870588003, 870589006, 870590002, 870591003, 119731000000000, 119741000000000, 119751000000000, 119981000000000, 124052000000000, 441590008, 840544004, 1017214008, 1119302008

#### Comorbidities

##### Cancer:

ICD-10: C00–C26, C40–C96

##### CKD:

D63.1, E08.22, E09.22, E13.22, I12, I12.0, I12.9, I13, I13.10, I13.11, I13.2, N18, N18.1, N18.2, N18.3, N18.4, N18.5, N18.6, N18.9, O10.211, O10.212, O10.213, O10.219, O10.22, O10.31, O10.32, O10.33, Q61.2, Q61.3, Q61.8, Z94.0

##### Diabetes:

ICD-10: E10, E11, E13

##### Hypertension:

ICD-10: I10, I11, I12, I13, I15

##### Immunocompromised:

ICD-10: B20, C00–C26, C40–C96, D00–D09, D37–D44, D80–D84, D89, Z94

### AIC comparisons of Poisson and Negative Binomial regressions

| Population | AIC Poisson | AIC NB    | Delta AIC |
|------------|-------------|-----------|-----------|
| Dec2020    | 123955.63   | 71840.52  | -52115.11 |
| Delta      | 100568.24   | 51387.44  | -49180.80 |
| Omicron    | 223433.61   | 125462.91 | -97970.70 |
